1 **Live imaging of *Yersinia* translocon formation and immune recognition in host cells**

2 Maren Rudolph<sup>1</sup>, Alexander Carsten<sup>1</sup>, Martin Aepfelbacher<sup>1\*</sup> and Manuel Wolters<sup>1\*</sup>

3 \*equal contribution

4 Institute of Medical Microbiology, Virology and Hygiene, University Medical Center Hamburg Eppendorf,

5 Martinstraße 52, 20251 Hamburg, Germany

6 Correspondence: [m.aepfelbacher@uke.de](mailto:m.aepfelbacher@uke.de)

## 7 **Abstract**

8 *Yersinia enterocolitica* employs a type three secretion system (T3SS) to translocate immunosuppressive  
9 effector proteins into host cells. To this end, the T3SS assembles a translocon/pore complex composed of  
10 the translocator proteins YopB and YopD in host cell membranes serving as an entry port for the  
11 effectors. The translocon is formed in a *Yersinia*-containing pre-phagosomal compartment that is  
12 connected to the extracellular space. As the phagosome matures, the translocon and the membrane  
13 damage it causes are recognized by the cell-autonomous immune system. We infected cells in the  
14 presence of fluorophore-labeled ALFA-tag-binding nanobodies with a *Y. enterocolitica* strain expressing  
15 YopD labeled with an ALFA-tag. Thereby we could record the integration of YopD into translocons and its  
16 intracellular fate in living host cells. YopD was integrated into translocons around 2 min after uptake of  
17 the bacteria into a phosphatidylinositol-4,5-bisphosphate enriched pre-phagosomal compartment and  
18 remained there for 27 min on average. Damaging of the phagosomal membrane as visualized with  
19 recruitment of GFP-tagged galectin-3 occurred in the mean around 14 min after translocon formation.  
20 Shortly after recruitment of galectin-3, guanylate-binding protein 1 (GBP-1) was recruited to  
21 phagosomes, which was accompanied by a decrease in the signal intensity of translocons, suggesting  
22 their degradation. In sum, we were able for the first time to film the spatiotemporal dynamics of *Yersinia*  
23 T3SS translocon formation and degradation and its sensing by components of the cell-autonomous  
24 immune system.

## 25 **Introduction**

26 Type three secretion systems (T3SSs) are multi-component, syringe-like nanomachines that enable the  
27 translocation of bacterial effector proteins across the bacterial envelope into eukaryotic host cells.  
28 Numerous human pathogenic bacteria such as *Yersinia*, *Pseudomonas*, *Chlamydia*, *Shigella* and  
29 *Salmonella* employ T3SS-mediated effector translocation to manipulate a variety of cellular processes,  
30 ultimately determining the nature of interaction with their hosts. T3SS effector proteins are diverse in  
31 structure and biochemical activities and vary considerably between species. In contrast, the T3SS  
32 machinery - also known as the injectisome - is highly conserved across different bacterial species and has  
33 been the subject of intensive structural and functional investigation [1-3].

34 Injectisomes can be separated into defined substructures such as the sorting platform, the export  
35 apparatus, the needle complex, the tip complex and the translocon (Fig 1A). The needle complex is a  
36 multi-ring cylindrical structure embedded in the bacterial envelope connected with a 30–70 nm long  
37 needle filament, forming a narrow channel, through which the translocator and effector proteins pass in  
38 an unfolded state [4, 5]. The needle at its distal end transitions into the tip complex, which consists of  
39 several copies of a hydrophilic translocator protein (5 copies of LcrV in *Yersinia*) [6]. The tip complex is  
40 involved in host cell sensing and regulates the assembly of the translocon/pore complex [7].

41 The translocon of all investigated T3SSs consists of two hydrophobic translocator proteins, a major (YopB  
42 in *Yersinia*) and a minor translocator (YopD in *Yersinia*) harboring one and two transmembrane domains,  
43 respectively [8, 9]. The two translocators are thought to form a heteromultimeric ring structure with an  
44 inner opening of approximately 2-4 nm in the host cell membrane [10-12]. Despite the central role of the  
45 translocon for effector translocation, many aspects of its regulation, assembly and composition have  
46 remained elusive. The hydrophobic nature of the translocators and the fact that the assembled  
47 translocon can only be studied when inserted into host cell membranes, up to now hindered its  
48 investigation due to a lack of suitable experimental approaches.

49 In a recent cryo-electron tomography study the host cell membrane embedded translocon of *Salmonella*  
50 *enterica* minicells was found to have a total diameter of 13.5 nm [13]. In our previous work translocons  
51 of *Yersinia enterocolitica* were imaged by super resolution immunofluorescence techniques (STED, SIM)  
52 using antibodies against the translocator proteins YopB and YopD. Thereby, the host cellular context that  
53 promotes translocon formation could be investigated, revealing that the translocons are formed upon  
54 uptake of the bacteria into a phosphatidylinositol-4,5-bisphosphate (PIP2) - enriched pre-phagosomal  
55 compartment/prevacuole, which is still connected to the extracellular space [14].

56 While these approaches provided a considerable degree of spatial resolution, none of them was suitable  
57 for time resolved imaging of translocons. Live imaging of bacterium-host cell interactions using  
58 fluorescence microscopy has become a key technology for understanding bacterial infection biology [15].  
59 However, live imaging of translocon formation and processing in host cells has not yet been  
60 accomplished. This is likely due to the elaborate and highly coordinated export of the hydrophobic  
61 translocator proteins through the T3SS needle and their interaction with the tip complex before they  
62 assemble a heteromultimeric translocon in the host cell membrane [8, 16]. Thus, finding a label for  
63 translocon proteins that is e.g., suited for live cell imaging and super resolution and at the same time  
64 does not disturb translocon assembly has proven to be difficult. Fusion proteins of T3SS substrates with  
65 fluorescent proteins like GFP were shown to be resistant to T3SS-mediated unfolding and block the  
66 secretion path [17]. Several other tags (e.g. self-labeling enzymes Halo, CLIP, SNAP, split-GFP, 4Cys-tag/  
67 FLaSH, iLOV) are secreted more effectively and have been used with varying degree of success for live  
68 imaging of translocated effectors [18-22].

69 We here report the first live cell imaging data of *Yersinia* translocon formation, immune sensing and  
70 processing by employing a *Yersinia* strain carrying a novel 13 amino acid peptide tag called ALFA-tag in  
71 the minor hydrophobic translocator YopD [23]. These data provide novel insights on the spatiotemporal  
72 dynamics and immune recognition of bacterial T3SS translocons.

## 73 **Results**

### 74 **Characterization of *Y. enterocolitica* strain WA-314 YopD-ALFA**

75 During infection with pathogenic yersiniae, a translocon/heteromultimeric pore complex composed of  
76 the translocator proteins YopB and YopD is integrated into host cell membranes, serving as an entry gate  
77 for the effector proteins (Fig 1A). In search of a method to visualize translocons in living cells using  
78 fluorescence microscopy, we constructed strain WA-314 YopD-ALFA harboring a YopD variant in which  
79 an ALFA-tag (plus linkers), was inserted between amino acids 194 and 195 (see Methods). The ALFA-tag  
80 insertion site is supposedly located in the extracellular part of YopD after it has integrated into the host  
81 cell membrane (Fig. 1B) [16]. The 13 amino acid long ALFA-tag can be bound with high affinity by specific  
82 nanobodies (NbALFA) [23].

83 We first investigated whether WA-314 YopD-ALFA retains wild type functionalities by comparing its  
84 secretion-, translocon forming- and translocation capabilities as well as cytotoxic effect with the parental  
85 strain WA-314 (Fig. 1C - F). SDS-PAGE and Western blot showed similar levels of total secreted proteins  
86 and secreted YopD-ALFA in WA-314 YopD-ALFA when compared to WA-314 (YopD-ALFA levels were  
87 compared to YopD levels), suggesting that protein secretion is unaffected in WA-314 YopD-ALFA (Fig.  
88 1C). Staining of WA-314 YopD-ALFA infected HeLa cells with fluorophore-labeled NbALFA revealed  
89 distinct fluorescence patches that were also detected by anti-YopD and anti-YopB antibodies (Fig. 1D).  
90 Such patches have recently been shown to represent clusters of translocons [14]. Further, WA-314 YopD-  
91 ALFA and WA-314 translocated similar amounts of a YopE  $\beta$ -lactamase fusion protein into host cells, as  
92 determined with a  $\beta$ -lactamase reporter system (Fig. 1E) [24-26]. In addition, rounding of HeLa cells was  
93 induced to a similar extent by infection with WA314 and WA-314 YopD-ALFA but not with WA314 $\Delta$ YopD.  
94 Because cell rounding is mainly caused by the translocated effectors YopE and YopH, this altogether  
95 indicates that effector translocation into host cells is unaffected in WA-314 YopD-ALFA (Fig. 1F). We  
96 conclude that the insertion of the ALFA-tag into YopD does not interfere with translocon function.

97

98 **Fluorescence staining of YopD-ALFA in pre-phagosomes, phagosomes and *Yersinia* cells**

99 In previous work we showed that translocon formation by *Y. enterocolitica* occurs in a specific pre-  
100 phagosomal host cell compartment, previously referred to as prevacuole [14, 27]. The *Yersinia*-  
101 containing pre-phagosome is characterized by a PIP2-enriched membrane and a narrow connection to  
102 the extracellular space, which cannot be passed by large extracellular molecules such as antibodies (MW  
103 approx. 150 kDa), but by small molecules like streptavidin (MW 53 kDa) [14, 27]. We therefore assumed  
104 that it should be feasible to stain YopD-ALFA in newly formed translocons by adding fluorophore-labeled  
105 NbALFA (MW 15 kDa) to fixed but unpermeabilized WA-314 YopD-ALFA infected cells. To test this notion  
106 and further investigate the localization of YopD-ALFA in the course of cell infection, we sequentially  
107 stained WA-314 YopD-ALFA infected HeLa cells without permeabilization (NbALFA-635), after  
108 permeabilization of the HeLa cell membranes with digitonin (NbALFA-580) and after additional  
109 permeabilization of the bacterial membranes with 0.1 % Triton X-100 (NbALFA-488) (Fig 2A). In  
110 unpermeabilized HeLa cells, patchy fluorescence signals associated with bacteria could be detected (Fig.  
111 2A, left), confirming that translocon-associated YopD-ALFA can be accessed by extracellularly added  
112 NbALFA. In digitonin-permeabilized HeLa cells, additional translocon signals could be found that were  
113 not seen in unpermeabilized cells, indicating that these translocons resided in closed phagosomes (Fig.  
114 2A, middle). After additional permeabilization of the bacterial membranes with Triton X-100, the  
115 intrabacterial pool of YopD-ALFA could be visualized in all bacteria, independent of whether they  
116 displayed translocons (Fig. 2A, right). The diffuse distribution of intrabacterial YopD-ALFA is in clear  
117 contrast to the patchy pattern of translocon-associated YopD-ALFA. To better resolve translocon  
118 associated from intrabacterial YopD-ALFA, we employed super resolution STED microscopy (Fig. 2B).  
119 While the intrabacterial distribution of YopD-ALFA remained diffuse also at this level of resolution, the  
120 extrabacterial YopD-ALFA produced distinct signals with a lateral extent of about 40 nm, which  
121 previously were identified as single translocons [14]. Overall, differential YopD-ALFA staining allows to

122 visualize *Yersinia* translocons located in pre-phagosomes and phagosomes, as well as the intrabacterial  
123 YopD pool.

124

### 125 **Live imaging of *Yersinia* translocon formation during cell infection**

126 Given the ability to stain translocons in fixed and unpermeabilized cells by external addition of  
127 fluorophore-labeled NbALFA, we hypothesized that this may also enable the recording of translocon  
128 formation in living cells. To test this possibility, live HeLa cells expressing GFP-LifeAct and myc-Rac1Q61L  
129 were infected with WA-314 YopD-ALFA in the presence of NbALFA-580 and imaged using spinning disc  
130 microscopy with one acquisition per minute. myc-Rac1Q61L was overexpressed in the HeLa cells because  
131 it strongly increases the percentage of bacteria forming translocons [14]. GFP-LifeAct was expressed to  
132 visualize host cells and to enable the localization of the cell adhering bacteria. With this approach,  
133 appearance and disappearance of fluorescence signals corresponding to translocon-associated YopD-  
134 ALFA could be recorded over time (Fig. 3A and movie S1). From their first visible appearance (at 5 min in  
135 Fig. 3A), the number and intensity of YopD-ALFA fluorescence signals peaked after about 20 min and  
136 decreased thereafter. The mean overall lifespan of YopD-ALFA fluorescence signals, defined as their first  
137 visible appearance until their complete vanishing, was determined to be 26.6 +/- 13 min (mean +/- S.D.,  
138 Fig. 3B). The disappearance of the fluorescence signals was most certainly not due to photo bleaching  
139 because no decay of fluorescence was observed in recordings with considerably higher imaging  
140 frequency (e.g acquisition rate: 3 per min in Fig. 3C vs. 1 per min in Fig. 3A). Taken together, for the first  
141 time we filmed assembly and disassembly of T3SS translocons in living host cells, thus providing new  
142 insights into the spatiotemporal dynamics of this central T3SS activity.

143

144 **Spatiotemporal dynamics and sequence of PIP2 accumulation and translocon formation in *Yersinia*-**  
145 **containing pre-phagosomes**

146 The ability to film the formation of translocons allowed us to study their spatiotemporal correlation with  
147 PIP2 accumulation in *Yersinia*-containing pre-phagosomes [14, 27]. For this, we infected HeLa cells  
148 expressing the PIP2 sensor PLC $\delta$ 1-PH-GFP with WA-314 YopD-ALFA in the presence of NbALFA-580 and  
149 performed live cell imaging (one z-stack every 20 s). Still frames of a representative event are depicted in  
150 Fig. 3C, showing a bacterium being completely enclosed with PIP2 positive host membranes.  
151 Recruitment of PLC $\delta$ 1-PH-GFP started at one pole of the bacterial cell und then continued until the  
152 whole cell was encompassed (Fig. 3C). In the representative example, the time to complete  
153 encompassment of the bacterial cell was around 100 s (start and completion of recruitment at 20 s and  
154 120 s, respectively; Fig. 3C). In this example the first YopD-ALFA signal (at 80 s; Fig. 3C) was observed  
155 about 60 s after the first PLC $\delta$ 1-PH-GFP signal and occurred at the pole of the bacterium that was  
156 engulfed first by PLC $\delta$ 1-PH-GFP (Fig. 3C and D). Thereafter, the number and intensity of the YopD-ALFA  
157 translocon signals further increased until the 240 s time point (Fig. 3C and D; movie S2). The median time  
158 lag between the first visible PLC $\delta$ 1-PH-GFP and YopD-ALFA signals was determined to be 2.0 +/- 4.6 min  
159 (median +/- S.D., Fig. 3E). Importantly, in all cases examined, the YopD-ALFA translocon signals occurred  
160 after or at the earliest simultaneously with the accumulation of PLC $\delta$ 1-PH-GFP around the bacteria (Fig.  
161 3E). To test the spatiotemporal coordination of PIP2 accumulation and translocon formation in  
162 physiological target cells of pathogenic yersiniae, we employed primary human macrophages [28]. Live  
163 macrophages expressing PLC $\delta$ 1-PH-GFP were infected with WA-314 YopD-ALFA in the presence of  
164 NbALFA-580 and investigated with live cell imaging. A representative movie shows that also in the  
165 macrophages the bacteria were enclosed with PLC $\delta$ 1-PH-GFP positive membrane (at 5 min in Fig. 3F;  
166 Movie S3) before the YopD-ALFA translocon signals appeared (at 15 min in Fig. 3F; Movie S3). In  
167 summary, these data demonstrate a close spatiotemporal sequence of PIP2 accumulation and T3SS  
168 translocon formation in pre-phagosomes, strongly suggesting that translocon formation requires  
169 phosphatidylinositol reorganization in pre-phagosomes.

170



171 **Spatiotemporal dynamics of galectin-3 and GBP-1 recruitment to *Yersinia* containing phagosomes**  
172 **harboring translocons**

173 It has previously been shown that the T3SS of *Yersinia* can damage the phagosome membranes  
174 surrounding these bacteria in cells [29, 30]. Yet, the dynamics and spatiotemporal relationship between  
175 membrane damage and formation of translocons/pores, that are thought to induce the membrane  
176 disruption, have not been elucidated. GFP-galectin-3 has been used as a sensor for membrane damage  
177 because of its ability to attach to  $\beta$ -galactose-containing glycoconjugates present in the luminal leaflet of  
178 phagosomal membranes (Fig. 4A) [31]. When expressed in the cytosol of host cells, GFP-galectin-3  
179 accumulates at phagosomal membranes when these have been ruptured e.g., by T3SS translocons (Fig.  
180 4A). To first confirm that membranes are disrupted by the *Yersinia* T3SS, we infected HeLa cells  
181 expressing GFP-galectin-3 with different *Yersinia* strains (Table 1). We observed recruitment of GFP-  
182 galectin-3 by approximately 13 % of both, cell-associated wild type WA-314 YopD-ALFA and effector-  
183 deficient WA-C pTTSS, but not by T3SS-deficient WA-C bacteria (Fig. 4B). This confirms that phagosome  
184 disruption is caused by the *Yersinia* T3SS without the involvement of effectors.

185 To test the spatiotemporal relation of translocon formation and membrane damage, we infected HeLa  
186 cells expressing GFP-galectin-3 with WA-314 YopD-ALFA in the presence of NbALFA-580 and performed  
187 live cell imaging. This revealed that GFP-galectin-3 recruitment was preceded by detectable YopD-ALFA  
188 signals in 92.6 %  $\pm$  5.6 % (mean  $\pm$  S.D.) of all GFP-galectin-3 recruitment events (Fig. 4C). The mean  
189 time interval between translocon formation and GFP-galectin-3 recruitment was determined to be 13.9  
190  $\pm$  6.3 min (mean  $\pm$  S.D., Fig. 4D). We also noticed that GFP-galectin-3 was recruited relatively abruptly  
191 to the entire phagosomal membrane and that its recruitment was accompanied by a decrease in the  
192 YopD-ALFA translocon signal (n = 4; Fig. 4E and F and movie S4). This suggests that galectin-3 may engage  
193 host defense mechanisms eventually leading to degradation of translocon proteins.

194 Recently it was shown that galectin-3 promotes recruitment of the guanylate-binding proteins (GBPs)  
195 GBP-1 and GBP-2 to *Yersinia*-containing compartments [29]. GBPs belong to the family of interferon-

196 inducible GTPases and facilitate cell-intrinsic immunity by targeting host defense proteins to pathogen  
197 containing compartments [32]. Further, GBP-1 was recently shown to directly bind to LPS of Gram-  
198 negative bacteria and function as an LPS-clustering surfactant that disrupts the physicochemical  
199 properties of the LPS layer [33-35]. To investigate the spatiotemporal coordination of galectin-3 and  
200 GBP-1 recruitment to bacteria that formed translocons, HeLa cells co-expressing galectin-3-mScarlet and  
201 GFP-GBP-1 were infected with WA-314 YopD-ALFA in the presence of NbALFA-580 and subjected to live  
202 cell imaging (Fig. 4G; Movie S5). GFP-GBP-1 was recruited specifically to bacteria that previously had  
203 formed translocons and recruited GFP-galectin-3 (100 % of observed GFP-GBP-1 recruitment events, n =  
204 45). GFP-GBP-1 recruitment (to bacteria that had formed translocons) was regularly observed shortly  
205 after or concomitant with GFP-galectin-3 recruitment (Fig. 4G; Movie S5). Staining with an anti-O8 LPS  
206 antibody failed to stain GBP-1 coated bacteria suggesting that GBP-1 directly interacts with the *Yersinia*  
207 LPS and thereby hinders detection by the anti-LPS antibody (Fig. 4H). These data suggest that *Yersinia*  
208 translocons cause disruption of phagosomal membranes which leads to sequential galectin-3 and GBP-1  
209 recruitment and, likely through the recruitment of additional factors, to translocon degradation.

210

## 211 **Discussion**

212 Here we used live cell imaging to characterize the spatiotemporal sequence of molecular events  
213 associated with *Yersinia* translocon assembly and disassembly in host cells. To this end, we constructed a  
214 *Yersinia* strain expressing an ALFA-tag labeled YopD that retained its functionality and could be visualized  
215 in fixed and living cells by binding to a fluorescently labeled nanobody (NbALFA). Live cell imaging was  
216 also facilitated by the fact that *Yersinia* translocon formation occurs in a pre-phagosomal host cell  
217 compartment where YopD-ALFA is accessible by externally added NbALFA. Thus the incorporation of  
218 YopD-ALFA into translocons, as measure for translocon formation, could be recorded and temporally and  
219 spatially correlated with the accumulation of the following biosensors i) PLC $\delta$ 1-PH-GFP, which senses

220 PIP2 at the pre-phagosome; ii) GFP-galectin-3, which senses phagosomal membrane disruption; and iii)  
221 GFP-GBP1, which senses activation of the cell autonomous immune system at the phagosome.  
222 Translocon formation was always initiated seconds to a few minutes after PIP2 accumulation, suggesting  
223 that a specific phospholipid composition in the pre-phagosomes may trigger the secretion of translocon  
224 proteins by the T3SS and/or is required for their membrane integration. PIP2 rich pre-phagosomes may  
225 also recruit host cell receptors like FPR1 and CCR5, which have been reported to promote *Y. pestis* and *Y.*  
226 *pseudotuberculosis* translocon formation [7, 36].

227 Disruption of the phagosomal membrane by *Yersinia* required a functional T3SS, was associated with  
228 only a small fraction of cell-associated bacteria on which we previously detected translocons in >90%,  
229 and occurred with a delay of approximately 14 min after translocon formation. This indicates that  
230 membrane integration of the translocons per se is not sufficient for membrane disruption and  
231 subsequent entry of galectin-3. It remains to be elucidated how translocons compromise the phagosome  
232 membrane, e.g., whether they act in terms of unregulated translocon activity if they are separated from  
233 the T3SS during phagosome maturation or whether membrane disrupting host immune factors that  
234 recognize the translocon might be involved.

235 In a recent study galectin-3 was found to recruit the guanylate binding proteins (GBPs) GBP-1 and GBP-2  
236 to *Yersinia* containing vacuoles dependent on a functional T3SS [29]. GBPs belong to the large group of  
237 interferon induced antimicrobial host cell factors known to be recruited to pathogen-containing vacuoles  
238 (PVs). They escort antimicrobial factors to the PVs and thereby contribute to the cell-autonomous  
239 immunity [32, 37]. Of note, the galectin-3 signal in our study usually covered the whole circumference of  
240 the bacteria indicating that the membrane is not substantially ruptured or detached from the bacteria as  
241 described for *Shigella* [31, 38]. GFP-galectin-3 and GBP1-GFP were sequentially recruited to bacteria-  
242 containing phagosomes that previously had formed translocons and were associated with a reduction of

243 the YopD-ALFA and LPS signals. The exact mechanisms responsible for the obvious dissolution of the  
244 translocon and the bacterial cell membranes are not known.

245 In summary, we describe here a new method for visualizing and filming the assembly and disassembly of  
246 *Yersinia* translocons by fluorescence microscopy in living cells. In this way, key aspects of the dynamics of  
247 translocon formation, its effects on membrane integrity, and recognition by host cell defense  
248 mechanisms could be recorded with high spatiotemporal resolution. The described approach might also  
249 be valuable for imaging of translocator proteins in other bacterial species. For this it will be critical to  
250 insert the tag into positions in the different translocators so that no interference with translocon  
251 function occurs.

252 More highly resolved molecular details of T3SS translocon formation, the effects of translocon pores on  
253 host membranes and their recognition by host immune factors may become available through the  
254 development and application of super resolution live imaging technologies like live cell STED and  
255 MINFLUX microscopy [39].

256

## 257 **Acknowledgements**

258 This study was supported by the Joachim Herz Foundation given to Alexander Carsten. We thank the UKE  
259 microscopy imaging facility (umif) for training and support. We thank Tomas Edgren for helpful  
260 discussion and knowing where to tag YopD.

261

## 262 **Materials and Methods**

### 263 **Materials**

264 All standard laboratory chemicals and supplies were purchased from Roth (Karlsruhe, Germany), Sigma-  
265 Aldrich (Steinheim, Germany) or Merck (Hohenbrunn, Germany) unless indicated otherwise.

266

### 267 **Plasmids**

268 The following plasmids were described previously: PLC $\delta$ 1-PH-GFP [40] was provided by T. Balla (National  
269 Institutes of Health, Bethesda, MD). The myc-Rac1Q61L plasmid [41] was kindly provided by Dr. Pontus  
270 Aspenström (Uppsala University, Uppsala, Sweden) and the GFP-GBP-1 plasmid [35] by P. Broz  
271 (University of Lausanne, Epalinges, Switzerland). pEGFP-galectin-3 [42] was purchased from Addgene  
272 (#73080) and the mScarlet-galectin 3 was generated by using the pEGFP-galectin-3 plasmid and replacing  
273 eGFP by mScarlet at the NheI/BglIII sites. pCMV-NbALFA-mScarlet-I (NanoTag Biotechnologies, Germany)  
274 was used as PCR amplification template (mScarlet fwd NheI:  
275 AGATCCGCTAGCGATGGTGAGCAAGGGCGAG; mScarlet rev BglIII:  
276 TGCCATAGATCTCTGTACAGCTCGTCCAT). The plasmid construct pMK-bla [43] was kindly provided by  
277 Erwin Bohn (Institute of Medical Microbiology and Hygiene, University of Tuebingen, Tuebingen,  
278 Germany) and the Lifeact-eGFP construct [44] was a kind gift of Michael Sixt (Max Planck Institute for  
279 Biochemistry, Munich, Germany).

280

### 281 **Antibodies and nanobodies**

282 Polyclonal rabbit anti-YopB (aa 1–168) and anti-YopD (aa 150–287) as well as rat anti-YopB (aa 1-168)  
283 antibodies were produced as described previously [14]. Rabbit polyclonal anti-*Y. enterocolitica* O:8 was  
284 purchased from Sifin (Berlin, Germany). Secondary anti-IgG antibodies and their sources were: Alexa488  
285 chicken goat anti-rat, Alexa568 goat anti-rabbit, Alexa647 goat anti-rabbit, (Molecular Probes, Karlsruhe,  
286 Germany), horseradish peroxidase linked donkey anti-rabbit (GE Healthcare, Chicago, USA).  
287 Fluorescently labeled primary camelid anti-ALFA nanobodies (NbALFA) and their source were: Alexa

288 Fluor 488 FluoTag<sup>®</sup>-X2 (NbALFA-488), Alexa Fluor 580 FluoTag<sup>®</sup>-X2 (NbALFA-580), Abberior<sup>®</sup>Star635P

289 FluoTag<sup>®</sup>-X2 (NbALFA-635) (NanoTag Biotechnologies, Göttingen, Germany).

290

## 291 **Oligonucleotides and sequences**

|                                                                              |                                                                                                       |
|------------------------------------------------------------------------------|-------------------------------------------------------------------------------------------------------|
| YopD-ALFA HomA fwd                                                           | TATTATCCTAACTTATTATTTTAAATTAATAATAAAAAGCCCTGGATTACCA<br>TTAGTTAA                                      |
| YopD-ALFA HomA rev                                                           | TTGGAAGAGGAACTGAGACGCCGCTTAACTGAACCAGGCGGAGGTGGAT<br>CTATCGGGAGAATATGGAAACCAGA                        |
| YopD-ALFA HomB fwd                                                           | GCGGCGTCTCAGTTCCTCTTCCAAACGGCTCGGGCCACCAGACCCGCCCG<br>AACCACCATCCTCTCTGCTTACCGCTTAT                   |
| YopD-ALFA HomB rev                                                           | AAAGCGGTGAGGTTAAAAAAA                                                                                 |
| YopD-crRNA fwd                                                               | TAGATCATATTCTCCCGATATCCTC                                                                             |
| YopD-crRNA rev                                                               | AGACGAGGATATCGGGAGAATATGA                                                                             |
| final insert sequence<br>( <u>linker</u> , <b>ALFA-tag</b> , <u>linker</u> ) | <u>GGTGGTTCGGGCGGGTCTGGTGGCCCGAGCCGTTTGAAGAGGAACTG</u><br><u>AGACGCCGCTTAACTGAACCAGGCGGAGGTGGATCT</u> |

292

## 293 **Ethic statement**

294 Approval for the analysis of anonymized blood donations (WF-015/12) was obtained by the Ethical

295 Committee of the Ärztekammer Hamburg (Germany).

296

## 297 **Source and generation of *Yersinia* mutants**

298 The *Yersinia* strains used here are listed in Table 1. *Y. enterocolitica* wild type strain WA-314 was a gift of

299 Jürgen Heesemann (Max von Pettenkofer Institute, Munich, Germany) and described previously [45].

300 WA-314 YopD-ALFA was generated using a CRISPR-Cas12a-assisted recombineering approach [46]. In

301 brief, a double stranded Homology Directed Repair (HDR) fragment containing the ALFA-tag and linker

302 sequence was generated via overlap extension PCR. For this a 500 bp homology arm (HomA) was

303 amplified from the *Y. enterocolitica* pYV virulence plasmid with the reverse primer YopD-ALFA HomA rev

304 including part of the ALFA-tag insert and linker and the corresponding forward primer YopD-ALFA HomA

305 fwd. The other homology arm (HomB) was amplified using the forward primer YopD-ALFA HomB fwd

306 including the remaining part of the ALFA-tag insert and linker and the corresponding reverse primer  
307 YopD-ALFA HomB rev. Both homology arms were used as templates in an overlap extension PCR using  
308 the outer primers (YopD-ALFA HomA fwd and YopD-ALFA HomB rev) to generate the final HDR fragment.  
309 The crRNAs required for targeting Cas12a to the defined insertion site were designed based on the 20 bp  
310 protospacer following the 3'-end of a PAM (5'-TTN-3'). The respective oligonucleotides were designed  
311 with Eco31L overhangs at the 5'- and 3'-ends (YopD-crRNA fwd and YopD-crRNA rev), annealed and  
312 ligated into the Eco31L digested pAC-crRNA vector harboring also a sacB sucrose sensitivity gene. 700 ng  
313 of the HDR fragment and 350 ng of the pAC-crRNA were electroporated into an electrocompetent WA-  
314 314 strain carrying pKD46-Cas12a, which harbors the lambda Red recombinase under control of an  
315 arabinose inducible promoter, Cas12a (Cas12a/Cpf1 from *Francisella novicida*) and a temperature-  
316 sensitive replicon. After successful editing of the virulence plasmid, the pAC-crRNA and pKD46-Cas12a  
317 plasmids were cured from the bacteria. Correct insertion of the ALFA-tag was confirmed by PCR and  
318 sequencing. The editing resulted in the expression of a modified YopD carrying the ALFA-tag between  
319 amino acids 194 and 195 (GGSGGGGSPRLEEELRRRLTEPGGGGS; linker, **ALFA-tag**, linker).

320 Table 1:

| Strain               | Relevant characteristic                                                                                                     | Source/References |
|----------------------|-----------------------------------------------------------------------------------------------------------------------------|-------------------|
| WA-314               | wild type strain carrying virulence plasmid pYV; serogroup O8; kanamycin resistance cassette in non-coding region of pYV-O8 | [45, 47]          |
| WA-C                 | pYV-cured derivative of WA-314                                                                                              | [47]              |
| WA-C pTTSS           | WA-C harboring pTTSS encoding the TTSS secretion/translocation apparatus of WA-314 but no Yop effector genes; SptR          | [48]              |
| WA-314 $\Delta$ YopD | WA-C harboring pYV $\Delta$ yopD; KanR                                                                                      | [14]              |
| WA-314 YopD-ALFA     | WA-314 with ALFA-tag inserted in YopD; KanR                                                                                 | this study        |
| WA-314 pMK-bla       | WA-314 harboring pMK-bla containing YopE53- $\beta$ -lactamase fusion; Kan <sup>R</sup> , CM <sup>R</sup>                   | [25]              |

|                          |                                                                          |            |
|--------------------------|--------------------------------------------------------------------------|------------|
| WA-314 YopD-ALFA pMK-bla | WA-314 YopD-ALFA harboring pYopE-bla; Kan <sup>R</sup> , CM <sup>R</sup> | this study |
|--------------------------|--------------------------------------------------------------------------|------------|

321

## 322 **Cell culture and transfection**

323 HeLa cells (ACC#57, DSMZ-German Collection of Microorganisms and Cell Cultures) were cultured at 37°C  
324 and 5% CO<sub>2</sub> in DMEM (Invitrogen, GIBCO, Darmstadt, Germany) supplemented with 10% FCS (v/v). For  
325 infection with bacteria, HeLa cells were seeded in 6 well plates (3x10<sup>5</sup> cells per well) or on glass  
326 coverslips (6x10<sup>4</sup> cells per well; confocal: Precision coverslips, round, 12 mm diameter, No 1.5, with  
327 precision thickness, Hartenstein, Würzburg, Germany; STED: 12mm, No. 1.5H for high resolution,  
328 Marienfeld GmbH, Lauda-Königshafen, Germany). For live imaging 2.5 x 10<sup>4</sup> HeLa cells were seeded in  
329 ibidi μ-slide 8 wells (ibidi, Martinsried, Germany). HeLa cells were transfected with 0.25 μg plasmid for  
330 coverslips or 0.125 μg plasmid for 8 well slides using Turbofect (Thermo Fisher Scientific, Waltham,  
331 Massachusetts, USA) for 16 h according to the manufacturer's protocol.

332 Human peripheral blood monocytes were isolated from heparinized blood as described previously [77].  
333 Monocytes/Macrophages were cultured in RPMI1640 (Invitrogen) containing 20 % heterologous human  
334 serum (v/v) for 7 days with medium changes every three days. Macrophages were transfected with the  
335 Neon Transfection System (Invitrogen) with 5 μg DNA per 10<sup>6</sup> cells (1000 V, 40 ms, 2 pulses) and infected  
336 4 h after transfection.

337

## 338 **Preparation of bacteria**

339 *Yersinia* were grown in Luria Bertani (LB) broth supplemented with nalidixic acid, kanamycin,  
340 spectinomycin or chloramphenicol as required at 27°C overnight and then diluted 1:20 in fresh LB broth,  
341 followed by cultivation at 37°C for 1.5 h to induce expression of the T3SS. For cell infection, bacteria  
342 were centrifuged, resuspended in ice-cold PBS and added to target cells at a defined multiplicity of  
343 infection (MOI), as specified in the figure captions. Bacteria were then centrifuged at 200 x g for 1 min  
344 onto the target cells to synchronize the bacterial attachment. For in-vitro Yop secretion, EGTA (5 mM),



345 MgCl<sub>2</sub> (15 mM) and glucose (0.2%, w/v) was added to the growth medium for Ca<sup>2+</sup> chelation after 1.5 h  
346 at 37°C, followed by another 3 h of incubation at 37°C, as described before [48]. The resulting samples  
347 were analyzed by SDS-PAGE, followed by either Coomassie staining or transfer to a PVDF membrane  
348 (Immobilon-P, Millipore), and analysis by Western blot using antisera against YopB and YopD.

349

### 350 **Fluorescence labeling**

351 Infected cells were washed twice with PBS and fixed with 4% PFA (v/v; Electron Microscopy Science,  
352 Hatfield, USA) in PBS for 5 min. Samples were treated with digitonin solution (90 µg/mL in PBS) to  
353 permeabilize cellular membranes and allow access of the nanobody to translocon-associated YopD-ALFA.  
354 For antibody stainings or staining of intrabacterial YopD-ALFA using the nanobody, samples were  
355 permeabilized with 0.1% Triton X-100 (v/v) in PBS for 15 min. After fixation and permeabilization  
356 coverslips were washed twice with PBS. Unspecific binding sites were blocked with 3% bovine serum  
357 albumin (BSA, w/v) in PBS for at least 30 min. Samples were then incubated with the indicated primary  
358 antibody (1:50) or fluorescently labeled FluoTag<sup>®</sup>-X2 anti-ALFA nanobody (1:200) for 1 h (16 h for STED  
359 samples using the nanobody) and incubated with a 1:200 dilution of the suitable fluorophore-coupled  
360 secondary antibody or fluorophore-coupled phalloidin (1:200, Invitrogen) and 4',6-diamidino-2-  
361 phenylindole (DAPI; 300 nM, Invitrogen) as indicated for 45 min. Nanobodies as well as primary and  
362 secondary antibodies were applied in PBS supplemented with 3% BSA. After each staining coverslips  
363 were washed three times with PBS. Coverslips for confocal microscopy were mounted in ProLong  
364 Diamond (Thermo Fisher Scientific) while STED samples were mounted in ProLong Gold (Thermo Fisher  
365 Scientific, Waltham, USA).

366

### 367 **Confocal microscopy**

368 Fixed samples were analyzed with a confocal laser scanning microscope (Leica TCS SP8) equipped with a  
369 63x oil immersion objective (NA 1.4) and Leica LAS X SP8 software (Leica Microsystems, Wetzlar,  
370 Germany) was used for acquisition.

371

### 372 **Live cell imaging**

373 For live imaging the cells were 8 well slides were placed in the prewarmed chamber supplied with 5%  
374 CO<sub>2</sub> of the spinning disc microscope Visitron SD-TRIF (Nikon Eclipse TiE, Nikon, Japan) with a 63x oil  
375 immersion objective (NA 1.40) and the VisiView software (Visitron Systems, Germany). The nanobody  
376 was diluted 1:300 in 200 µl DMEM with 10% FCS and mixed with the WA-314 YopD-ALFA. The number of  
377 bacteria was chosen according to the intended MOI. The medium was removed from the cells and the  
378 200 µl medium containing nanobody and bacteria was added. The imaging process was started  
379 immediately.

380

### 381 **Super resolution imaging**

382 STED nanoscopy and corresponding confocal microscopy were carried out in line sequential mode using  
383 an Abberior Instruments Expert Line STED microscope based on a Nikon Ti-E microscopy body and  
384 employed for excitation and detection of the fluorescence signal a 60x Plan APO 1.4 oil immersion  
385 objective. A pulsed 640 nm laser was used for excitation and a pulsed near-infrared laser (775 nm) was  
386 used for STED. The detected fluorescence signal was directed through a variable sized pinhole (1 Airy  
387 unit at 640 nm) and detected by avalanche photo diodes (APDs) with appropriate filter settings for Cy5  
388 (615 - 755 nm). Images were recorded with a dwell time of 0.5 µs and the pixel size was set to be 10 nm.  
389 The acquisitions were carried out in time gating mode i.e. with a time gating delay of 750 ps and a width  
390 of 8 ns. STED images were acquired with a 2D-STED donut.

391

### 392 **Image analysis**

393 The z-stacks of images acquired of both fixed and live samples were combined to one image using  
394 maximum intensity projection. These images were used to determine the lifespan of a detectable  
395 translocon signal, the fluorescence intensity of PLC $\delta$ 1-PH and YopD-ALFA signal in a region of interest  
396 around the bacterium for each time point as well as the time PLC $\delta$ 1-PH is present before translocon  
397 formation. In addition, the percentage of galectin-3 positive bacteria in cells harboring translocon  
398 forming bacteria was quantified in fixed samples. Live imaging was used to determine the number of  
399 galectin-3 positive bacteria with and without prior YopD-ALFA signal as well as the time interval between  
400 translocon formation and galectin-3 recruitment. The fluorescence intensity of YopD-ALFA and GFP-  
401 galectin-3 signal was measured in a region of interest around the bacterium for each time point of a  
402 representative movie. In general, the fluorescence intensity measurements were normalized to the  
403 lowest intensity measured and the highest intensity value was set to 100%. Live imaging data were  
404 additionally analyzed for the presence of galectin-3 before GBP-1 recruitment to phagosomes.

405

#### 406 **Detection of Bla-activity by immunofluorescence microscopy**

407 One day before infection  $2.5 \times 10^4$  HeLa cells were seeded in ibidi  $\mu$ -Slide 8 wells. The following day cells  
408 were infected with different bacterial strains as indicated and after 30 min the medium was replaced by  
409 200  $\mu$ l CCF4/AM loading solution (prepared according to the manufacturer's instructions) diluted in  
410 DMEM supplemented with 10% FCS and 2.5 mM probenecid. The cells were placed in the prewarmed  
411 chamber supplied with 5% CO<sub>2</sub> of the laser scanning microscope Leica TCS SP8 and imaging was  
412 performed using a 20x oil immersion objective (NA 0.75) and the Leica LAS X SP8 software (Leica  
413 Microsystems, Wetzlar, Germany).

414

415

416 **Figure legends**

417 **Fig. 1: Insertion of the ALFA-tag into YopD does not interfere with protein function and allows for**  
418 **nanobody-based staining of translocons.**

419 **(A) Schematic representation of the T3SS in *Yersinia enterocolitica* with ALFA-tagged YopD.** The T3SS  
420 connecting the bacterial and host cell membranes. The enlargement shows the translocon with ALFA-  
421 tagged YopD labeled with a fluorescently tagged nanobody (NbALFA). IM: inner bacterial membrane. PG:  
422 bacterial peptidoglycan layer. OM: outer bacterial membrane. HCM: host cell membrane. Adapted from  
423 [13, 49]. **(B) Model of YopD-ALFA and YopB inserted into the host cell membrane.** The scheme is  
424 adapted from [16] and based on data on interactions of *Pseudomonas aeruginosa* PopD and PopB. The  
425 red box indicates the inserted ALFA-tag between amino acids 194 and 195 on the extracellular part of  
426 YopD. **(C) Released proteins of WA-314 and WA-314 YopD-ALFA.** Secreted proteins were precipitated  
427 from the culture supernatant and analyzed by Coomassie stained SDS gel (upper panel) and Western blot  
428 (lower panel) for their YopD content using specific antibodies. Black asterisks indicate the position of the  
429 YopD bands in the SDS gel. **(D) Staining of YopD-ALFA in translocons.** Rac1Q61L expressing HeLa cells  
430 were infected with WA-314 YopD-ALFA at an MOI of 10 for 1 h, fixed and host cell membranes were  
431 permeabilized with digitonin. Co-staining of translocon components was conducted with anti-YopB  
432 (shown in green) and anti-YopD (shown in red) antibodies and NbALFA-635 (shown in magenta). Scale  
433 bar: 2  $\mu\text{m}$ . **(E) Comparison of effector protein translocation by  $\beta$ -lactamase assay.** HeLa cells pretreated  
434 with a cell permeant FRET dye (CCF4/AM) were infected for 1 h with WA-314, WA-314 pYopE-bla and  
435 WA-314 YopD-ALFA pYopE-bla at an MOI of 100 and imaged by confocal microscopy. Excitation of  
436 coumarin results in FRET to fluorescein in the uncleaved CCF4 emitting a green fluorescent signal.  
437 Cleavage of the cephalosporin core of CCF4 by the beta-lactamase tagged to a truncated YopE  
438 translocated into the host cell disrupts FRET and results in a blue fluorescent signal induced by the  
439 excitation of coumarin. Cells with incomplete CCF4 cleavage appear cyan. Scale bar: 200  $\mu\text{m}$ . The  
440 percentage of green, cyan and blue cells was determined in one experiment from 354, 329 and 305 cells

441 for WA-314, WA-314 pMK-bla and WA-314-YopD-ALFA pMK-bla, respectively. **(F) Cytotoxicity assay.**  
442 HeLa cells were infected for 1 h with WA-314, WA-314 YopD-ALFA and WA-314 $\Delta$ YopD at an MOI of 100  
443 and imaged by phase contrast microscopy. Depicted are phase contrast images of a representative  
444 experiment. Scale bar: 20  $\mu$ m.

445  
446 **Fig. 2: Differential permeabilization for selective staining of YopD-ALFA in different cellular**  
447 **compartments.**

448 **(A) Selective nanobody staining of YopD-ALFA in different cellular compartments.** The schematic (top)  
449 shows different levels of host- and bacterial cell permeabilization and according accessibility of different  
450 pools of YopD-ALFA for NbALFA staining. Rac1Q61L expressing HeLa cells were infected with WA-314  
451 YopD-ALFA at an MOI of 10 for 1 h, fixed and stained with NbALFA-635 without prior permeabilization to  
452 specifically target translocon associated YopD-ALFA in the pre-phagosomal compartment (left, shown in  
453 red). Host cell membranes were permeabilized with digitonin and translocons located in closed  
454 phagosomes were stained with NbALFA-580 (middle, shown in magenta). Note that pre-phagosomal  
455 YopD-ALFA was already saturated with NbALFA-635 (red) during the first staining step. Finally, also the  
456 bacterial membranes were permeabilized with triton and the intrabacterial pool of YopD-ALFA was  
457 stained with NbALFA-488 (right, shown in green). Scale bar: 2  $\mu$ m. **(B) STED imaging of intrabacterial and**  
458 **translocon-associated YopD-ALFA.** Rac1Q61L expressing HeLa cells were infected with WA-314 YopD-  
459 ALFA at an MOI of 10 for 1 h, fixed and stained with NbALFA-635 (shown in red) with prior  
460 permeabilization of host cell membranes using digitonin to target translocon associated YopD-ALFA.  
461 Bacterial membranes were permeabilized with triton and the intrabacterial pool of YopD-ALFA was  
462 stained with NbALFA-580 (shown in green). The images were acquired using super resolution STED  
463 microscopy. The boxed region in the left of the image is depicted as enlargements in separate channels  
464 at the side. Scale bar: 1  $\mu$ m (overview) and 200 nm (enlargements).

465

466 **Fig. 3: Nanobody-based live imaging of translocons: Formation and lifespan of the translocon during**  
467 **cell infection.**

468 **(A) Live imaging of translocons during HeLa cell infection.** HeLa cells expressing myc-Rac1Q61L and GFP-  
469 LifeAct were infected with WA-314 YopD-ALFA at an MOI of 20 and incubated with NbALFA-580 diluted  
470 in the cell culture medium. Cells were imaged with a spinning disk microscope recording z-stacks every  
471 minute. Stacks for each time point were combined to one image using maximum intensity projection and  
472 one image every 5 min is shown. The left panel shows the overview image at 0 min. The boxed region in  
473 the overview image shows the area of the video depicted in still frames to the right. Dashed white lines  
474 indicate the outline of the bacteria. Scale bars: 10  $\mu\text{m}$  (overview) and 2  $\mu\text{m}$  (still frames). **(B) Lifespan of**  
475 **the translocon.** The lifespan of the translocons was determined using movies that recorded the YopD-  
476 signal of individual bacteria from their formation to disappearance. Experimental conditions are as in (A).  
477  $n = 25$  bacteria (7 independent experiments, 13 host cells) **(C) PIP2 accumulation at the host membrane**  
478 **precedes translocon formation in HeLa cells.** HeLa cells expressing myc-Rac1Q61L and PLC $\delta$ 1-PH-GFP  
479 were infected with WA-314 YopD-ALFA at an MOI of 20 and incubated with NbALFA-580 diluted in cell  
480 culture medium. Cells were imaged with a spinning disk microscope recording z-stacks every 20 s. Stacks  
481 for each time point were combined to one image using maximum intensity projection and one image  
482 every 20 s is shown. The left panel shows the overview image at 0 min. The boxed region in the overview  
483 image shows the area of the video depicted in still frames to the right. White arrows indicate the  
484 appearance of PLC $\delta$ 1-PH-GFP and the first translocon signal. Scale bar: 10  $\mu\text{m}$  (overview) and 2  $\mu\text{m}$  (still  
485 frames). **(D) Fluorescence intensities of PIP2 marker PLC $\delta$ 1-PH-GFP and YopD-ALFA signals.** The relative  
486 fluorescence intensities of PLC $\delta$ 1-PH-GFP and NbALFA-580 signals at the bacteria in (C) were plotted to  
487 illustrate the temporal relationship of signal appearances. **(E) Temporal relationship of PIP2**  
488 **accumulation and appearance of YopD-ALFA signal.** The time intervals between first occurrence of the  
489 PLC $\delta$ 1-PH-GFP and first YopD-ALFA signals were measured based on live imaging experiments performed  
490 as in (C). Each dot represents one measurement.  $n = 43$  bacteria (3 independent experiments, 13

491 movies). **(F) PIP2 accumulation at the host membrane precedes translocon formation in primary**  
492 **human macrophages.** Primary human macrophages expressing PLC $\delta$ 1-PH-GFP were infected with WA-  
493 314 YopD-ALFA at an MOI of 20 and incubated with NbALFA-580 diluted in cell culture medium. Cells  
494 were imaged with a spinning disk microscope recording z-stacks every minute. Stacks for each time point  
495 were combined to one image using maximum intensity projection and one image every 5 min is shown.  
496 The left panel shows the overview image at 0 min. The boxed region in the overview image shows the  
497 area of the video depicted in still frames to the right. White arrows indicate the appearance of PLC $\delta$ 1-PH-  
498 GFP and the first translocon signal. Scale bars: 10  $\mu$ m (overview) and 2  $\mu$ m (still frames).

499  
500 **Fig. 4: Nanobody-based live imaging of translocons: Galectin-3 and GBP-1 recruitment upon translocon**  
501 **induced membrane damage.**

502 **(A) Schematic representation of galectin-3 recruitment following membrane damage during infection.**  
503 Galectin-3 (shown in green) is found in the cytosol of the host cell. Translocon formation appears to  
504 induce membrane damage allowing access of galectin-3 to glycans in the lumen of vacuoles. **(B) Vacuolar**  
505 **membrane damage by the T3SS.** HeLa cells expressing myc-Rac1Q61L and GFP-galectin-3 were infected  
506 with WA-C, WA-C pTTSS and WA-314 YopD-ALFA at an MOI of 100 for 1 h, fixed and permeabilized using  
507 digitonin. Cells were stained with anti-YopD antibody, Alexa633 phalloidin and DAPI. The percentage of  
508 galectin-3 positive bacteria per cell was quantified for WA-C, WA-C pTTSS and WA-314 YopD-ALFA (n =  
509 1680, 9 host cells; n = 508 bacteria, 7 host cells; n = 1065 bacteria, 10 host cells). Only cells harboring  
510 translocon forming bacteria were analyzed for WA-C pTTSS and WA-314 YopD-ALFA infections. **(C)**  
511 **Fraction of galectin recruitments without and with prior YopD-ALFA signal.** HeLa cells expressing myc-  
512 Rac1Q61L and GFP-galectin-3 were infected with WA-314 YopD-ALFA at an MOI of 20 and incubated with  
513 NbALFA-580 diluted in cell culture medium. Cells were imaged with a spinning disk microscope recording  
514 z-stacks every minute. Galectin-3 recruitment events were quantified with respect to whether YopD-  
515 ALFA signal is present before recruitment. n = 330 uptake events (6 independent experiments, 38

516 movies). **(D) Temporal relationship of YopD-ALFA signal appearance and galectin-3 recruitment.** HeLa  
517 cells expressing myc-Rac1Q61L and GFP-galectin-3 were infected with WA-314 YopD-ALFA at an MOI of  
518 20 and incubated with NbALFA-580 diluted in cell culture medium. Cells were imaged with a spinning  
519 disk microscope recording z-stacks every minute. The time intervals between first occurrence of the  
520 translocon signal and first GFP-galectin-3 signals were measured. Each dot represents one measurement.  
521  $n = 36$  bacteria (4 independent experiments; 9 movies). **(E) Galectin-3 recruitment to phagosomes**  
522 **containing translocon forming bacteria.** Live imaging experiments were performed as in (C). The z-stacks  
523 for each time point were combined to one image using maximum intensity projection and one image  
524 every 5 min is representatively shown. Scale bar: 2  $\mu\text{m}$ . The relative fluorescence intensities at the  
525 bacteria were plotted to illustrate the temporal relationship of NbALFA-580 and GFP-galectin-3 signals.  
526 **(F) Loss of YopD-ALFA signal after GFP-galectin-3 recruitment.** Live imaging experiments were  
527 performed as in (C). The relative fluorescence intensities of the translocon signal were measured in the  
528 last frame before and in the frames 5 min and 10 min after recruitment of GFP-galectin-3.  $n = 4$   
529 measurements (1 experiment, 3 host cells). **(G) GBP-1 recruitment to galectin-3 positive bacteria.** HeLa  
530 cells expressing myc-Rac1Q61L, mScarlet-galectin-3 (shown in green) and GFP-GBP-1 (shown in red)  
531 were infected with WA-314 YopD-ALFA at an MOI of 20 and incubated with NbALFA-580 (shown in  
532 magenta) diluted in cell culture medium. Cells were imaged with a spinning disk microscope recording z-  
533 stacks every 5 minutes. The z-stacks for each time point were combined to one image using maximum  
534 intensity projection and images are shown starting 20 min after uptake of the bacteria. Scale bar: 5  $\mu\text{m}$ .  
535 **(H) GBP-1 positive bacteria lack LPS antibody staining.** HeLa cells expressing myc-Rac1Q61L and GFP-  
536 GBP-1 (shown in green) were infected with WA-314 YopD-ALFA at an MOI of 30, fixed and permeabilized  
537 using digitonin. Cells were stained with anti-LPS antibody (shown in magenta). The boxed regions (I, II) in  
538 the overview image are depicted as enlargements in separate channels to the right. Dashed white lines  
539 indicate the outline of the nucleus in the overview image and the bacteria in the enlargements. Scale  
540 bar: 10  $\mu\text{m}$  (overview) and 2  $\mu\text{m}$  (enlargement).



541 **References**

- 542 1. Deng, W., et al., *Assembly, structure, function and regulation of type III secretion systems*. Nat  
543 Rev Microbiol, 2017. **15**(6): p. 323-337.
- 544 2. Lara-Tejero, M. and J.E. Galan, *The Injectisome, a Complex Nanomachine for Protein Injection*  
545 *into Mammalian Cells*. EcoSal Plus, 2019. **8**(2).
- 546 3. Pinaud, L., P.J. Sansonetti, and A. Phalipon, *Host Cell Targeting by Enteropathogenic Bacteria*  
547 *T3SS Effectors*. Trends Microbiol, 2018. **26**(4): p. 266-283.
- 548 4. Kubori, T., et al., *Supramolecular structure of the Salmonella typhimurium type III protein*  
549 *secretion system*. Science, 1998. **280**(5363): p. 602-5.
- 550 5. Schraidt, O. and T.C. Marlovits, *Three-dimensional model of Salmonella's needle complex at*  
551 *subnanometer resolution*. Science, 2011. **331**(6021): p. 1192-5.
- 552 6. Mueller, C.A., et al., *The V-antigen of Yersinia forms a distinct structure at the tip of injectisome*  
553 *needles*. Science, 2005. **310**(5748): p. 674-6.
- 554 7. Osei-Owusu, P., et al., *FPR1 is the plague receptor on host immune cells*. Nature, 2019.  
555 **574**(7776): p. 57-62.
- 556 8. Mattei, P.J., et al., *Membrane targeting and pore formation by the type III secretion system*  
557 *translocon*. FEBS J, 2011. **278**(3): p. 414-26.
- 558 9. Mueller, C.A., P. Broz, and G.R. Cornelis, *The type III secretion system tip complex and translocon*.  
559 Mol Microbiol, 2008. **68**(5): p. 1085-95.
- 560 10. Neyt, C. and G.R. Cornelis, *Insertion of a Yop translocation pore into the macrophage plasma*  
561 *membrane by Yersinia enterocolitica: requirement for translocators YopB and YopD, but not LcrG*.  
562 Mol Microbiol, 1999. **33**(5): p. 971-81.
- 563 11. Ide, T., et al., *Characterization of translocation pores inserted into plasma membranes by type III-*  
564 *secreted Esp proteins of enteropathogenic Escherichia coli*. Cell Microbiol, 2001. **3**(10): p. 669-79.
- 565 12. Blocker, A., et al., *The tripartite type III secretin of Shigella flexneri inserts IpaB and IpaC into*  
566 *host membranes*. J Cell Biol, 1999. **147**(3): p. 683-93.
- 567 13. Park, D., et al., *Visualization of the type III secretion mediated Salmonella-host cell interface using*  
568 *cryo-electron tomography*. Elife, 2018. **7**.
- 569 14. Nauth, T., et al., *Visualization of translocons in Yersinia type III protein secretion machines during*  
570 *host cell infection*. PLoS Pathog, 2018. **14**(12): p. e1007527.
- 571 15. Yao, Z. and R. Carballido-Lopez, *Fluorescence imaging for bacterial cell biology: from localization*  
572 *to dynamics, from ensembles to single molecules*. Annu Rev Microbiol, 2014. **68**: p. 459-76.
- 573 16. Armentrout, E.I. and A. Rietsch, *The Type III Secretion Translocation Pore Senses Host Cell*  
574 *Contact*. PLoS Pathog, 2016. **12**(3): p. e1005530.
- 575 17. Radics, J., L. Konigsmaier, and T.C. Marlovits, *Structure of a pathogenic type 3 secretion system in*  
576 *action*. Nat Struct Mol Biol, 2014. **21**(1): p. 82-7.
- 577 18. Gawthorne, J.A., et al., *Visualizing the Translocation and Localization of Bacterial Type III Effector*  
578 *Proteins by Using a Genetically Encoded Reporter System*. Appl Environ Microbiol, 2016. **82**(9): p.  
579 2700-2708.
- 580 19. Goser, V., et al., *Self-Labeling Enzyme Tags for Analyses of Translocation of Type III Secretion*  
581 *System Effector Proteins*. mBio, 2019. **10**(3).
- 582 20. Van Engelenburg, S.B. and A.E. Palmer, *Imaging type-III secretion reveals dynamics and spatial*  
583 *segregation of Salmonella effectors*. Nat Methods, 2010. **7**(4): p. 325-30.
- 584 21. Enninga, J., et al., *Secretion of type III effectors into host cells in real time*. Nat Methods, 2005.  
585 **2**(12): p. 959-65.
- 586 22. Ehsani, S., C.D. Rodrigues, and J. Enninga, *Turning on the spotlight--using light to monitor and*  
587 *characterize bacterial effector secretion and translocation*. Curr Opin Microbiol, 2009. **12**(1): p.  
588 24-30.

- 589 23. Gotzke, H., et al., *The ALFA-tag is a highly versatile tool for nanobody-based bioscience*  
590 *applications*. Nat Commun, 2019. **10**(1): p. 4403.
- 591 24. Charpentier, X. and E. Oswald, *Identification of the secretion and translocation domain of the*  
592 *enteropathogenic and enterohemorrhagic Escherichia coli effector Cif, using TEM-1 beta-*  
593 *lactamase as a new fluorescence-based reporter*. J Bacteriol, 2004. **186**(16): p. 5486-95.
- 594 25. Wolters, M., et al., *Cytotoxic necrotizing factor-Y boosts Yersinia effector translocation by*  
595 *activating Rac protein*. J Biol Chem, 2013. **288**(32): p. 23543-53.
- 596 26. Wolters, M., et al., *Analysis of Yersinia enterocolitica Effector Translocation into Host Cells Using*  
597 *Beta-lactamase Effector Fusions*. J Vis Exp, 2015(104).
- 598 27. Sarantis, H., et al., *Yersinia entry into host cells requires Rab5-dependent dephosphorylation of*  
599 *PI(4,5)P(2) and membrane scission*. Cell Host Microbe, 2012. **11**(2): p. 117-28.
- 600 28. Bekere, I., et al., *Yersinia remodels epigenetic histone modifications in human macrophages*. PLoS  
601 Pathog, 2021. **17**(11): p. e1010074.
- 602 29. Feeley, E.M., et al., *Galectin-3 directs antimicrobial guanylate binding proteins to vacuoles*  
603 *furnished with bacterial secretion systems*. Proc Natl Acad Sci U S A, 2017. **114**(9): p. E1698-  
604 E1706.
- 605 30. Zwack, E.E., et al., *Guanylate Binding Proteins Regulate Inflammasome Activation in Response to*  
606 *Hyperinjected Yersinia Translocon Components*. Infect Immun, 2017. **85**(10).
- 607 31. Paz, I., et al., *Galectin-3, a marker for vacuole lysis by invasive pathogens*. Cell Microbiol, 2010.  
608 **12**(4): p. 530-44.
- 609 32. Pilla-Moffett, D., et al., *Interferon-Inducible GTPases in Host Resistance, Inflammation and*  
610 *Disease*. J Mol Biol, 2016. **428**(17): p. 3495-513.
- 611 33. Kutsch, M. and J. Coers, *Human guanylate binding proteins: nanomachines orchestrating host*  
612 *defense*. FEBS J, 2021. **288**(20): p. 5826-5849.
- 613 34. Kutsch, M., et al., *Direct binding of polymeric GBP1 to LPS disrupts bacterial cell envelope*  
614 *functions*. EMBO J, 2020. **39**(13): p. e104926.
- 615 35. Santos, J.C., et al., *Human GBP1 binds LPS to initiate assembly of a caspase-4 activating platform*  
616 *on cytosolic bacteria*. Nat Commun, 2020. **11**(1): p. 3276.
- 617 36. Sheahan, K.L. and R.R. Isberg, *Identification of mammalian proteins that collaborate with type III*  
618 *secretion system function: involvement of a chemokine receptor in supporting translocon activity*.  
619 mBio, 2015. **6**(1): p. e02023-14.
- 620 37. Kutsch, M. and J. Coers, *Human guanylate binding proteins: nanomachines orchestrating host*  
621 *defense*. FEBS J, 2020.
- 622 38. Chang, Y.Y., et al., *Shigella hijacks the exocyst to cluster macropinosomes for efficient vacuolar*  
623 *escape*. PLoS Pathog, 2020. **16**(8): p. e1008822.
- 624 39. Carsten, A., et al., *Visualization of bacterial type 3 secretion system components down to the*  
625 *molecular level by MINFLUX nanoscopy*. bioRxiv, 2021: p. 2021.09.27.461991.
- 626 40. Balla, T. and P. Varnai, *Visualization of cellular phosphoinositide pools with GFP-fused protein-*  
627 *domains*. Curr Protoc Cell Biol, 2009. **Chapter 24**: p. Unit 24 4.
- 628 41. Aspenstrom, P., A. Fransson, and J. Saras, *Rho GTPases have diverse effects on the organization*  
629 *of the actin filament system*. Biochem J, 2004. **377**(Pt 2): p. 327-37.
- 630 42. Maejima, I., et al., *Autophagy sequesters damaged lysosomes to control lysosomal biogenesis*  
631 *and kidney injury*. EMBO J, 2013. **32**(17): p. 2336-47.
- 632 43. Koberle, M., et al., *Yersinia enterocolitica targets cells of the innate and adaptive immune system*  
633 *by injection of Yops in a mouse infection model*. PLoS Pathog, 2009. **5**(8): p. e1000551.
- 634 44. Riedl, J., et al., *Lifect: a versatile marker to visualize F-actin*. Nat Methods, 2008. **5**(7): p. 605-7.
- 635 45. Oellerich, M.F., et al., *Yersinia enterocolitica infection of mice reveals clonal invasion and abscess*  
636 *formation*. Infect Immun, 2007. **75**(8): p. 3802-11.

- 637 46. Yan, M.Y., et al., *CRISPR-Cas12a-Assisted Recombineering in Bacteria*. Appl Environ Microbiol,  
638 2017. **83**(17).
- 639 47. Heesemann, J. and R. Laufs, *Construction of a mobilizable Yersinia enterocolitica virulence*  
640 *plasmid*. J Bacteriol, 1983. **155**(2): p. 761-7.
- 641 48. Trulzsch, K., et al., *Analysis of chaperone-dependent Yop secretion/translocation and effector*  
642 *function using a mini-virulence plasmid of Yersinia enterocolitica*. Int J Med Microbiol, 2003.  
643 **293**(2-3): p. 167-77.
- 644 49. Berger, C., et al., *Structure of the Yersinia injectisome in intracellular host cell phagosomes*  
645 *revealed by cryo FIB electron tomography*. J Struct Biol, 2021. **213**(1): p. 107701.

646

647

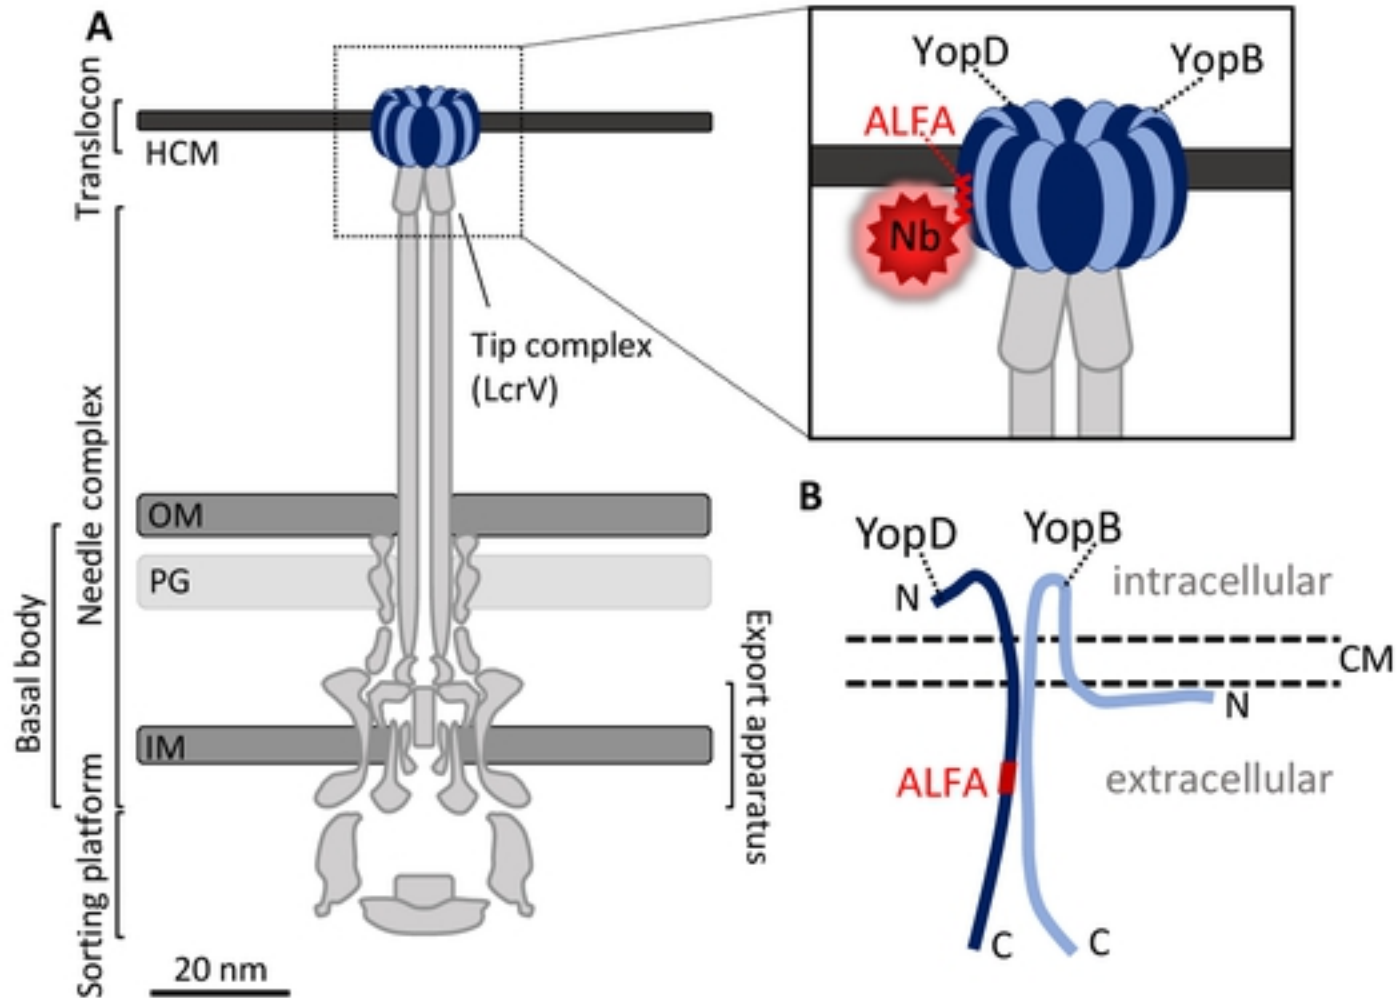

bioRxiv preprint doi: <https://doi.org/10.1101/2022.01.10.475601>; this version posted January 10, 2022. The copyright holder for this preprint (which was not certified by peer review) is the author/funder, who has granted bioRxiv a license to display the preprint in perpetuity. It is made available under aCC-BY 4.0 International license.

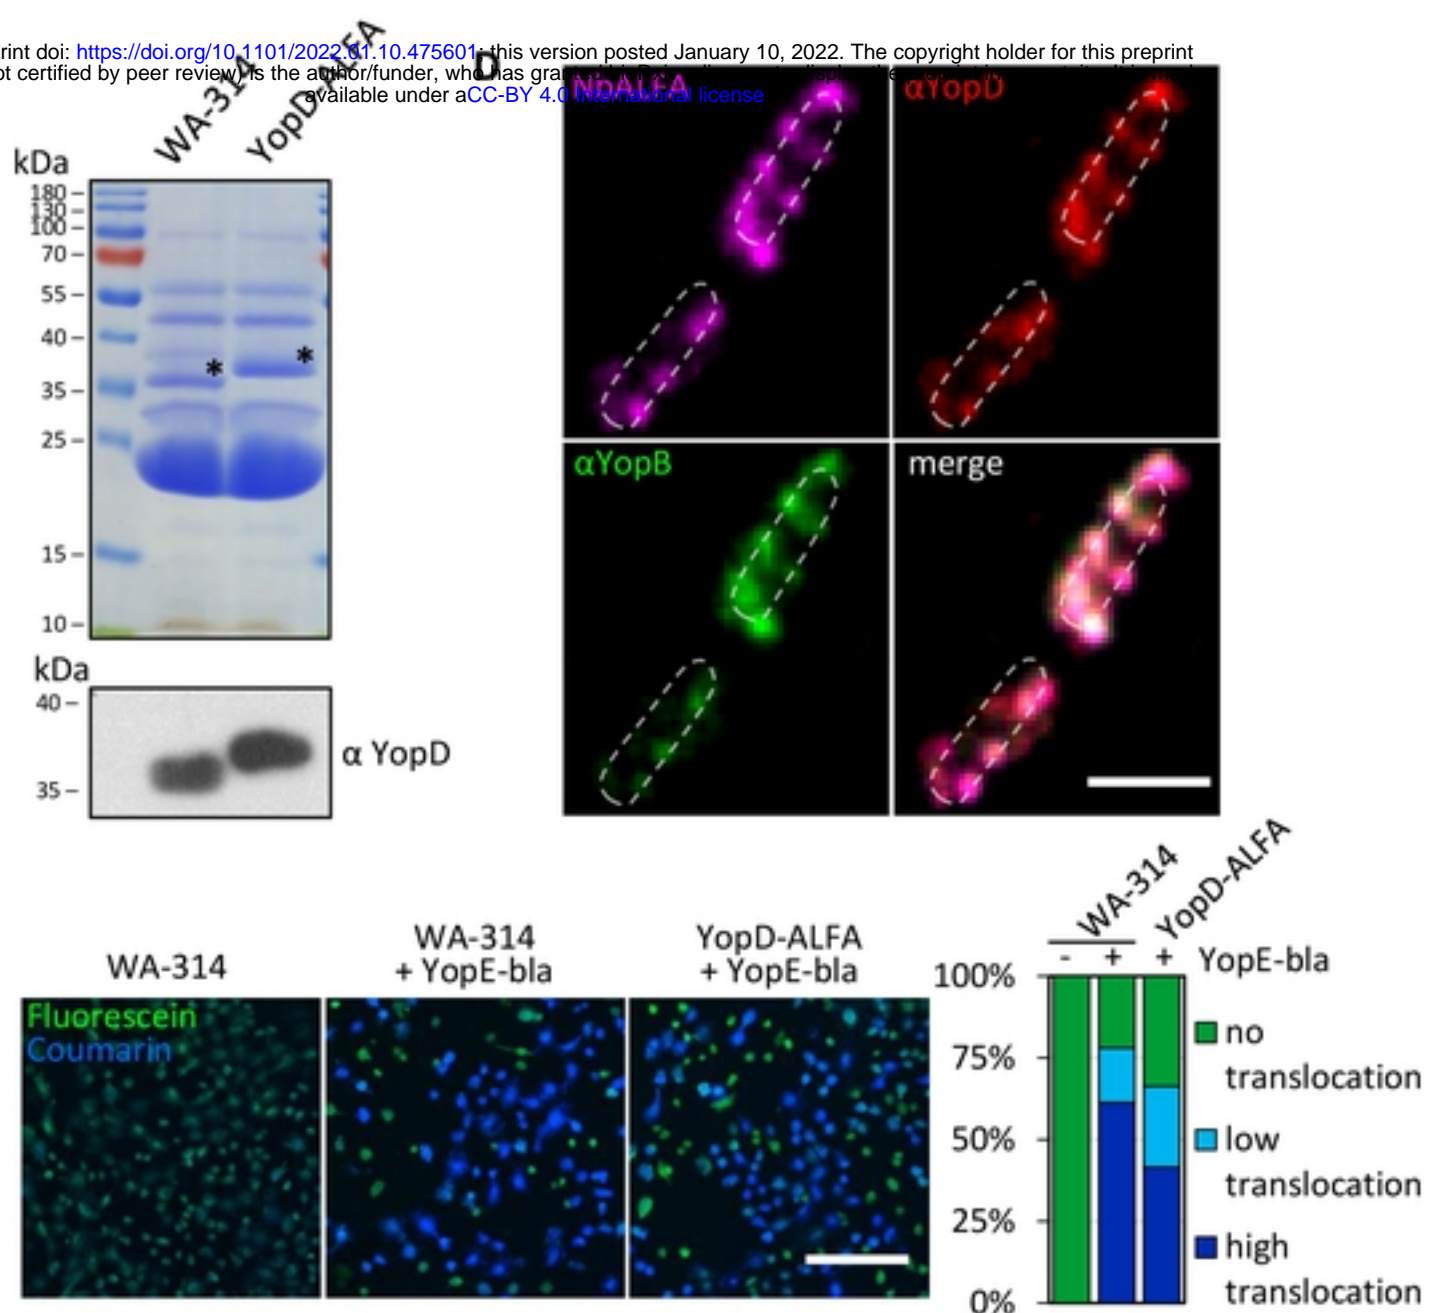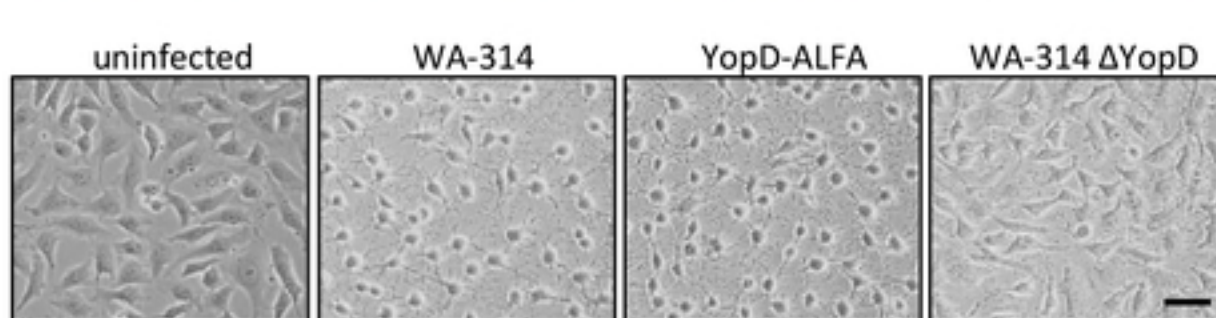

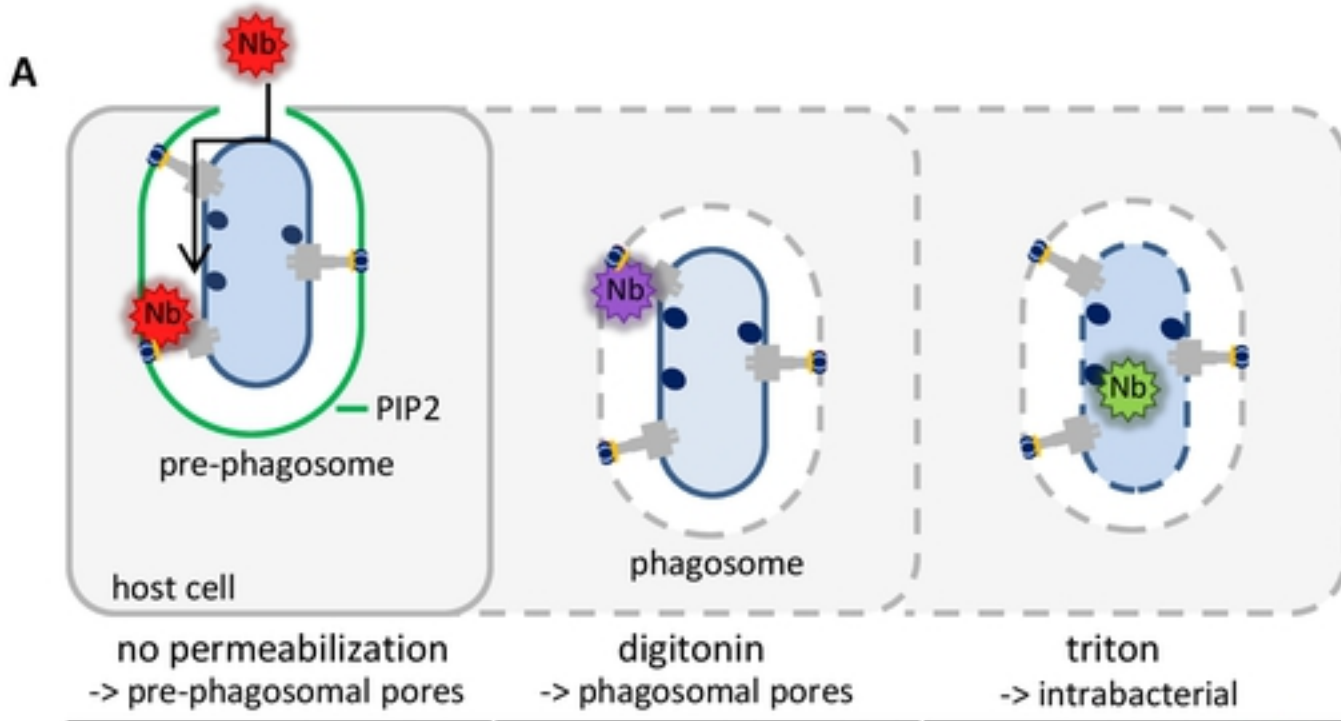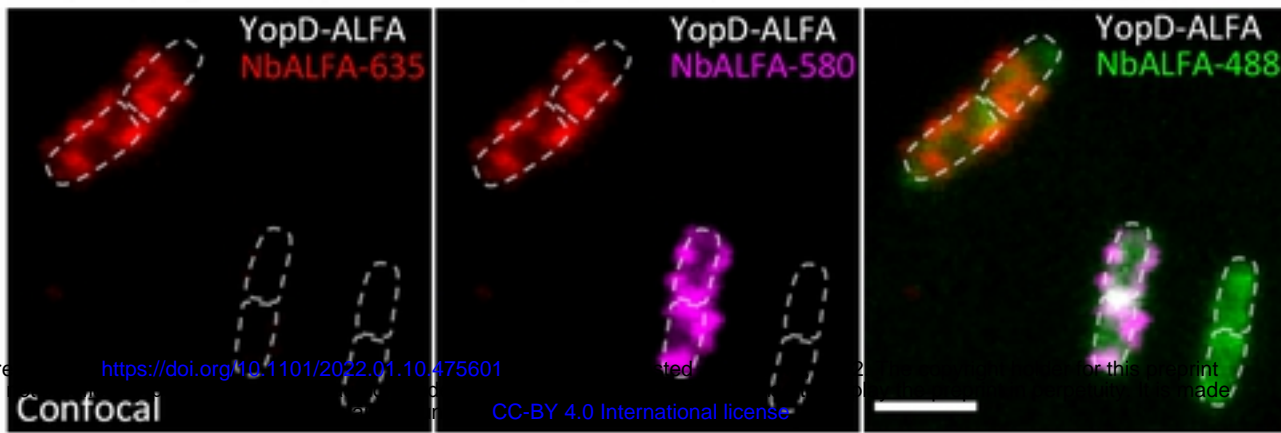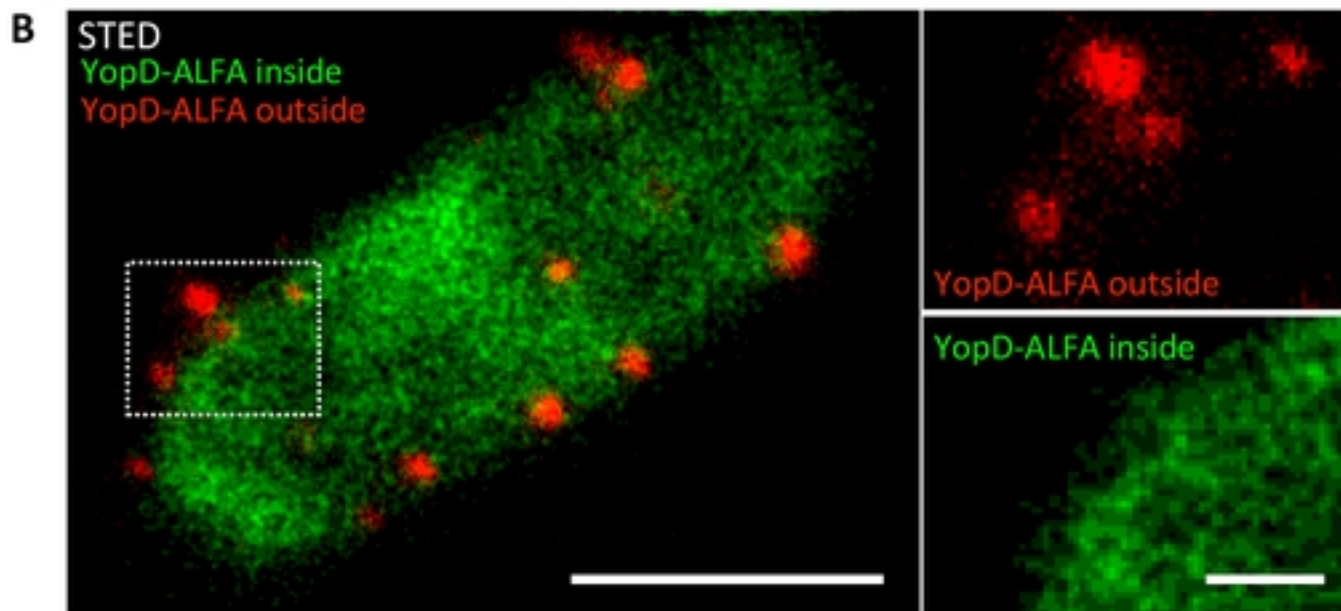

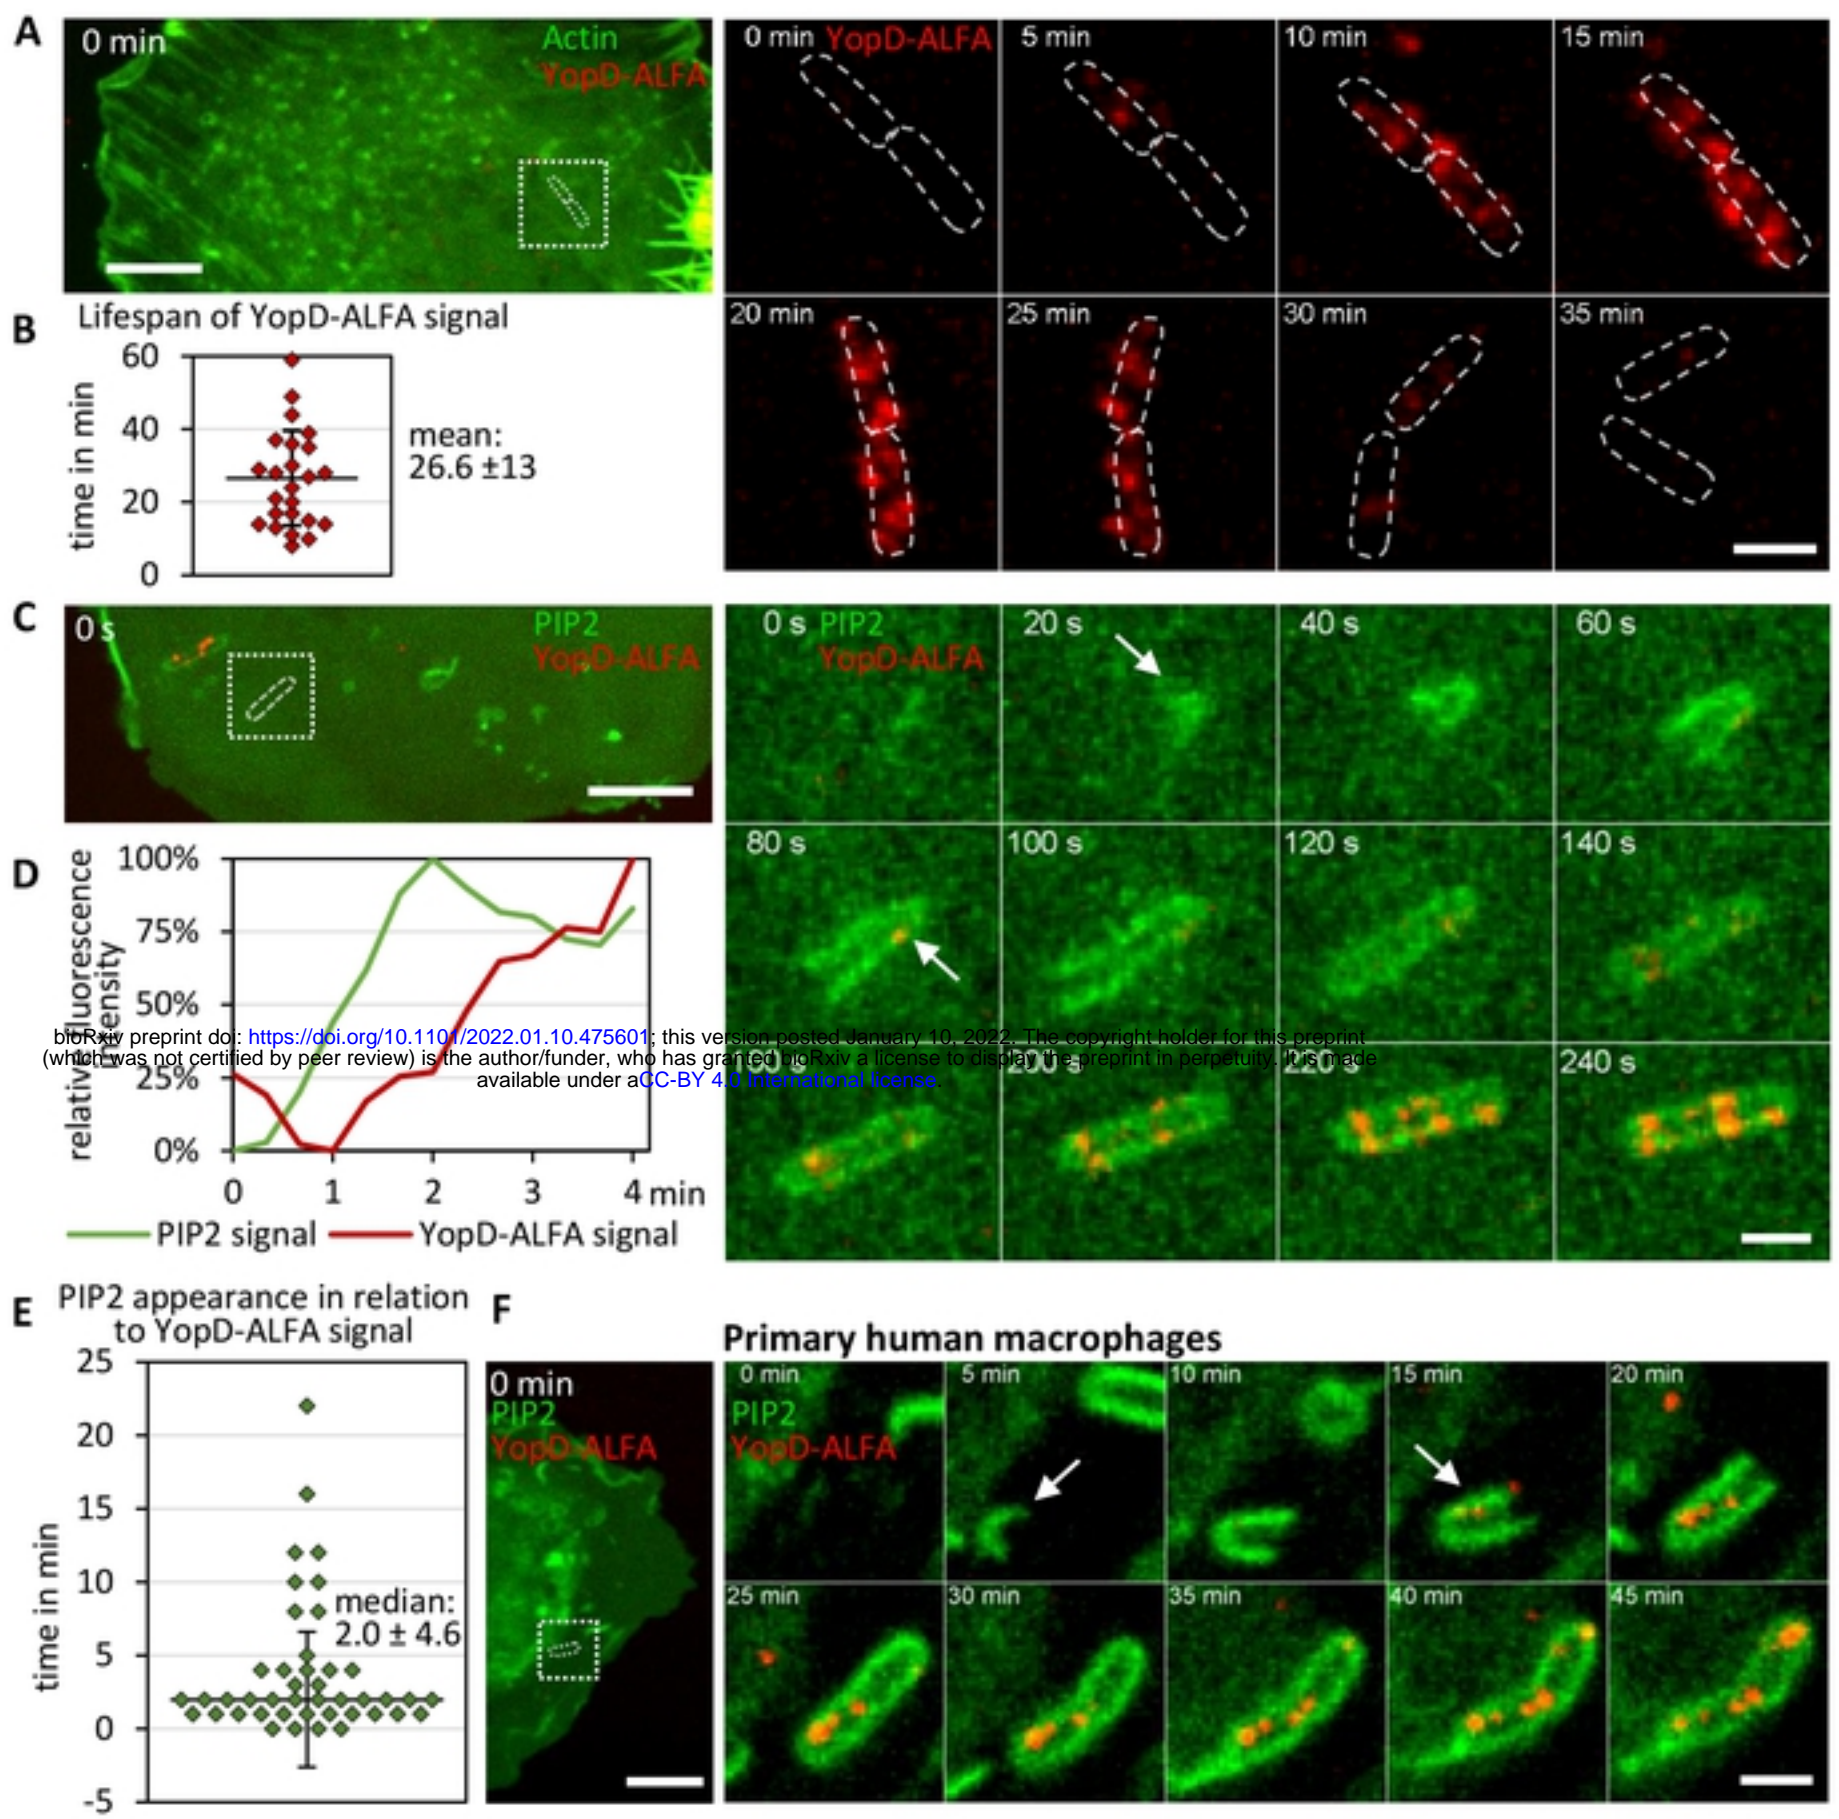

bioRxiv preprint doi: <https://doi.org/10.1101/2022.01.10.475601>; this version posted January 10, 2022. The copyright holder for this preprint (which was not certified by peer review) is the author/funder, who has granted bioRxiv a license to display the preprint in perpetuity. It is made available under aCC-BY 4.0 International license.

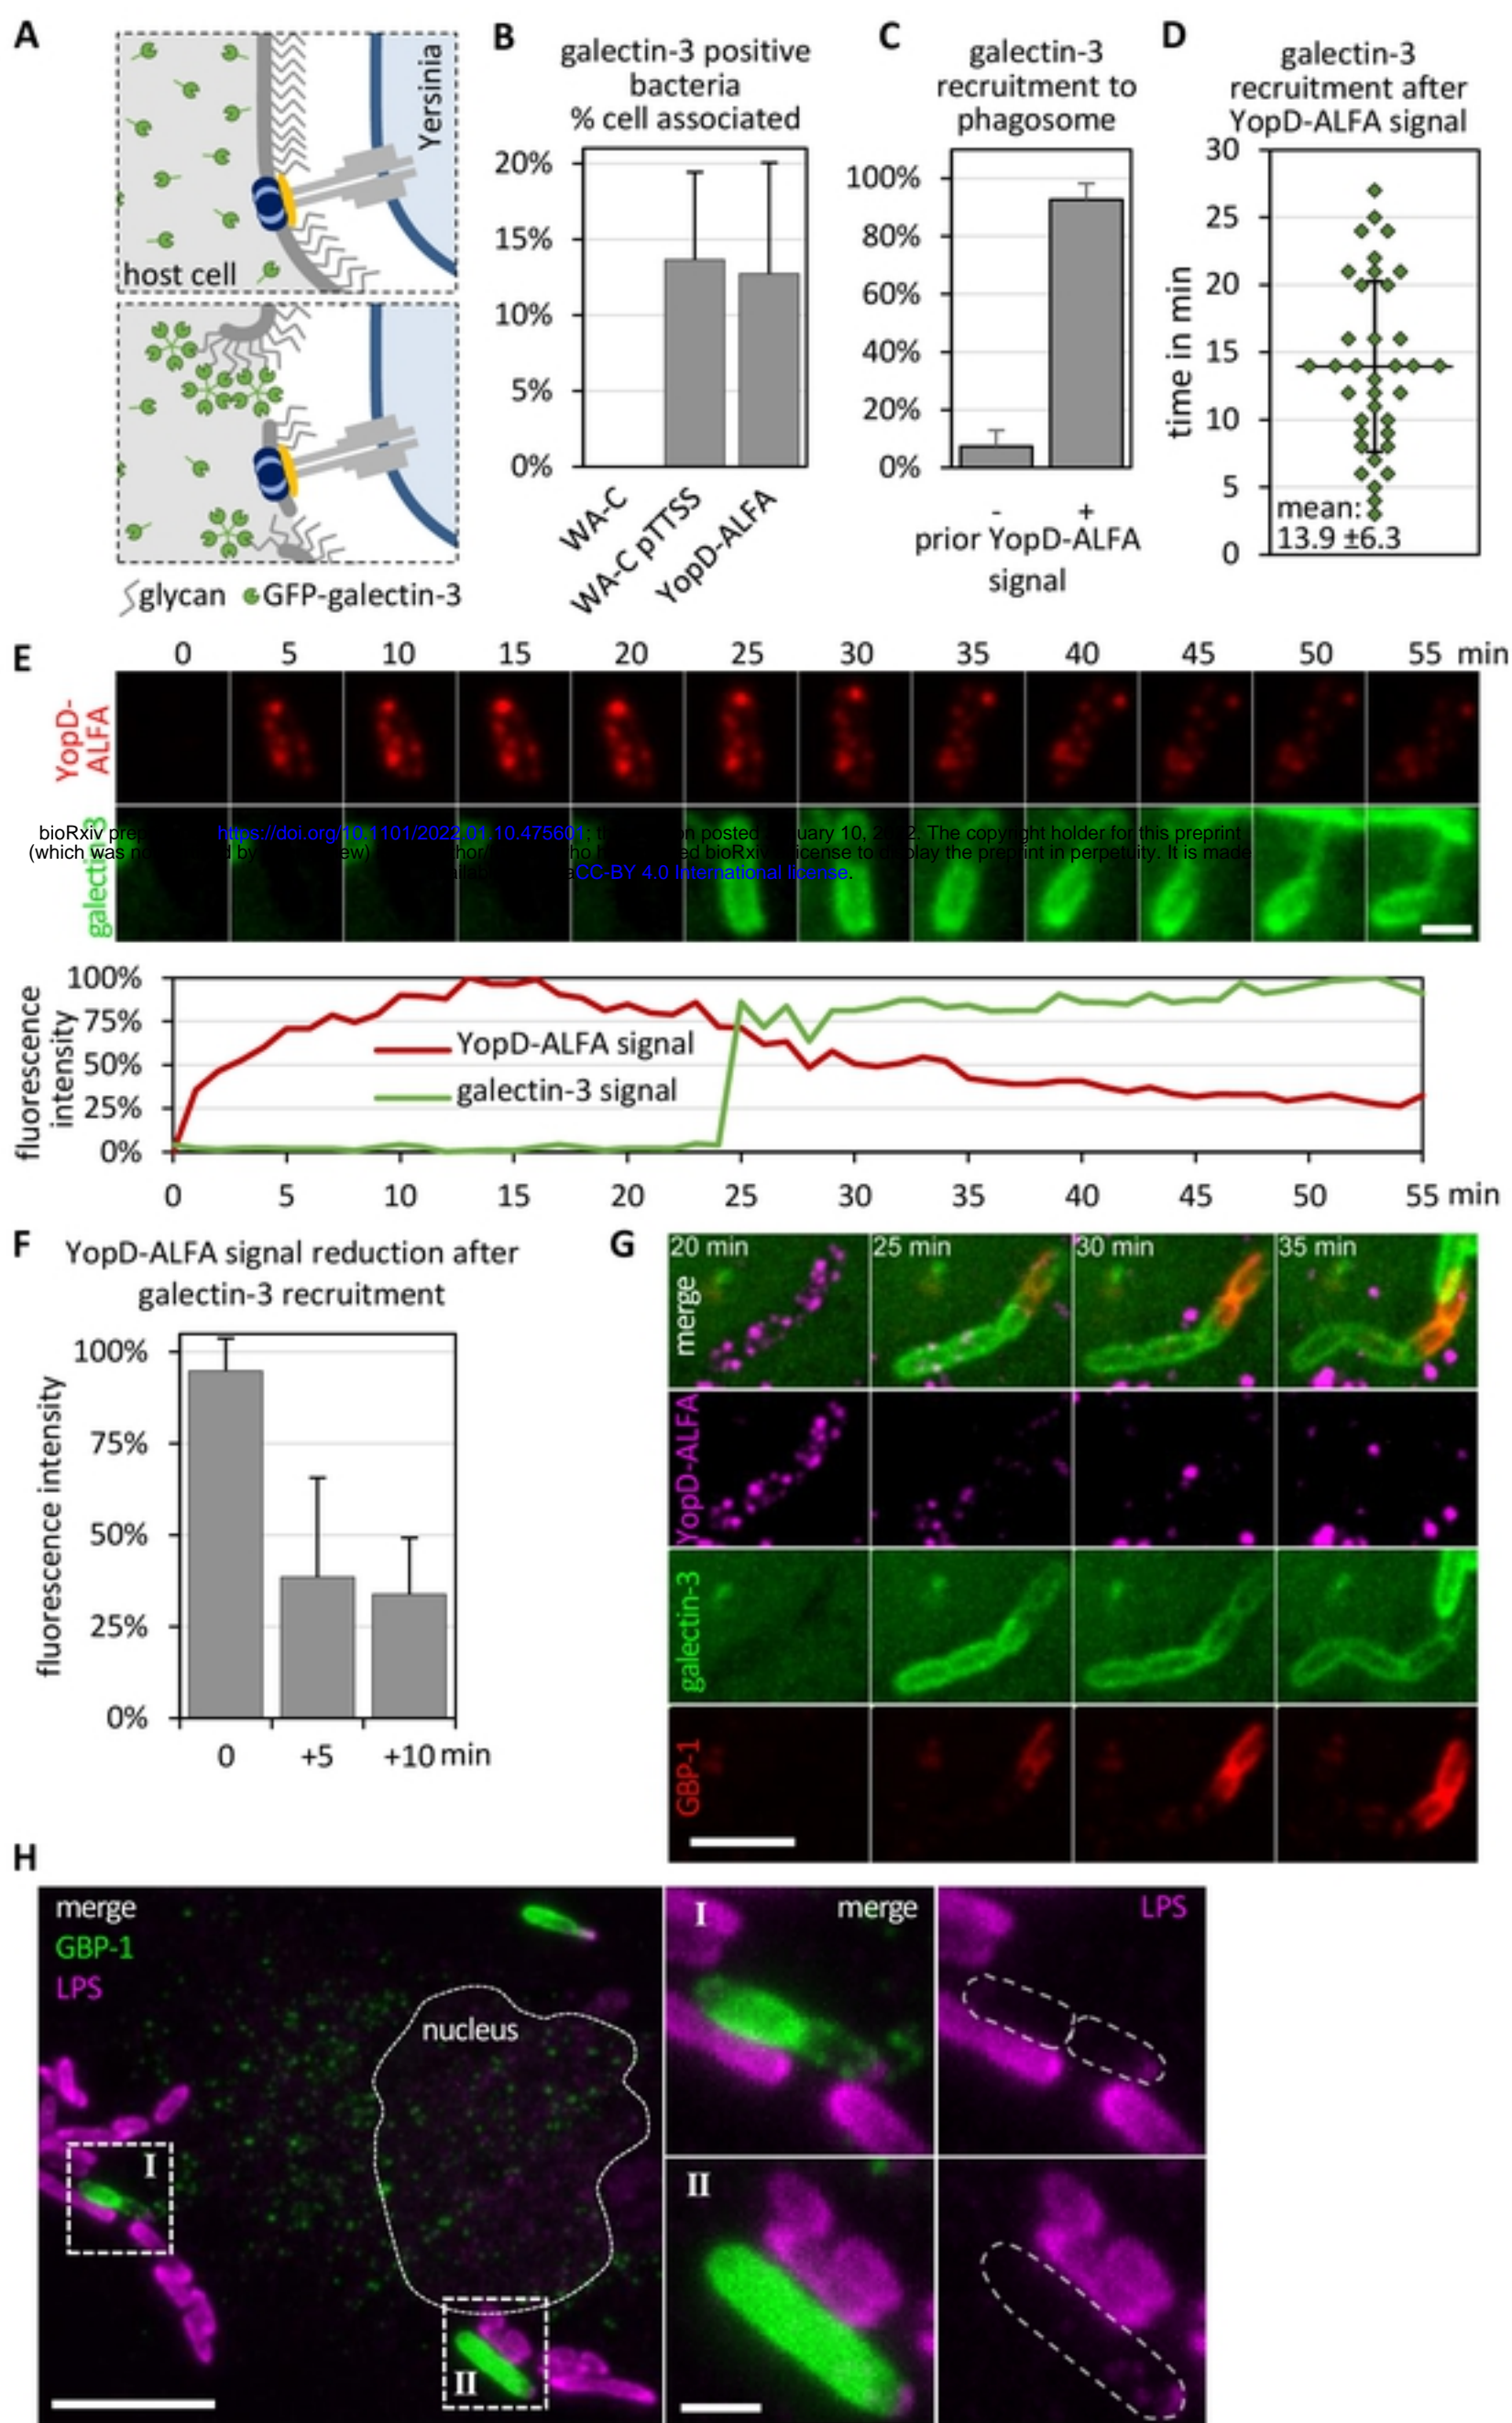

Source: https://www.biorxiv.org/content/10.1101/2022.01.10.475601v1.full.pdf
